# Supplementary material
Source: publisher figshare collection journal article supplement (https://gsajournals.figshare.com/ndownloader/files/25816568)
Supplement: Supplementary file 1 [file 25816568]

## Sheet: Sheet1
Table S5. Primers for HMA genotyping for the knock-out mutants.
Gene symbols	Forward	Reverse
Ppa-ser-1	TGGGGAAGATAAAATAGCTCCAGTC	GACGCTCATGTGAACGATAGAAGC
Ppa-ser-4	CTAGTCTGCGATATGTGGATTACTG	GTGATAAGTCCCGAACTCGAATG
Ppa-ser-5	TCAAGACGAGCTTATGTTGCTC	AACTGATTGATGAGATGGAACG
Ppa-ser-7	TACTTCAGATTCTGATCGTGATCGTC	CTAGCGAGGAAATTGTACTCATTCC
Ppa-mod-1	AGATCTGATGCATTGTTCCACTAC	TTGAGGAAACGAGACTGAAATAGG
